# Supplementary material for: Olfactory chemosensation extends lifespan through TGF-β signaling and UPR activation
Source: PubMed Central journal article supplement (PMC10432268; doi:10.1038/s43587-023-00467-1), 2023-07-27
Supplement: 43587_2023_467_MOESM1_ESM.pdf [file 43587_2023_467_MOESM1_ESM.pdf]

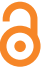

---

# Olfactory chemosensation extends lifespan through TGF- $\beta$ signaling and UPR activation

---

In the format provided by the authors and unedited

---

## Table of Contents

1. **Supplementary Table 1. Survival information for lifespan experiments.**
2. **Supplementary Table 2. List of *C. elegans* strains used in this work.**
- 5 3. **Supplementary Table 3. List of qPCR primers used in this work.**
4. **Supplementary Table 4. List of CRISPR primers and oligonucleotides used in this work.**

**Supplementary Table 1. Survival information for lifespan experiments.**

| Strain              | Treatment    | Median lifespan (days) | Control      | Median lifespan (days) | P value (Mantel-Cox) |
|---------------------|--------------|------------------------|--------------|------------------------|----------------------|
| N2                  | + 1-undecene | 20                     | - 1-undecene | 18                     | 0.0227               |
| N2                  | + 1-undecene | 20                     | - 1-undecene | 18                     | 0.0357               |
| N2                  | + 1-undecene | 26                     | - 1-undecene | 21                     | 0.0185               |
| N2                  | + 1-undecene | 25                     | - 1-undecene | 21                     | 0.0007               |
| N2                  | + 1-undecene | 25                     | - 1-undecene | 21                     | <0.0001              |
| N2                  | + 1-undecene | 23                     | - 1-undecene | 19                     | <0.0001              |
| <i>xbp-1(zc12)</i>  | + 1-undecene | 14                     | - 1-undecene | 14                     | 0.7015               |
| <i>xbp-1(zc12)</i>  | + 1-undecene | 18                     | - 1-undecene | 20                     | <0.0001              |
| <i>xbp-1(zc12)</i>  | + 1-undecene | 22                     | - 1-undecene | 22                     | 0.0066               |
| <i>daf-1(m40)</i>   | + 1-undecene | 21                     | - 1-undecene | 25                     | 0.9948               |
| <i>daf-1(m40)</i>   | + 1-undecene | 21                     | - 1-undecene | 23                     | 0.2990               |
| <i>daf-7(e1372)</i> | + 1-undecene | 21                     | - 1-undecene | 21                     | 0.4488               |
| <i>daf-7(e1372)</i> | + 1-undecene | 21                     | - 1-undecene | 23                     | 0.7628               |
| N2                  | + pyrrole    | 24                     | - pyrrole    | 19                     | <0.0001              |
| N2                  | + pyrrole    | 22                     | - pyrrole    | 22                     | 0.0046               |
| <i>xbp-1(zc12)</i>  | + pyrrole    | 17                     | - pyrrole    | 17                     | 0.0071               |
| <i>xbp-1(zc12)</i>  | + pyrrole    | 19                     | - pyrrole    | 17                     | <0.0001              |
| <i>xbp-1(zc12)</i>  | + pyrrole    | 22                     | - pyrrole    | 17                     | <0.0001              |

10 **Supplementary Table 2. List of *C. elegans* strains used.**

| <b><i>Caenorhabditis elegans</i> strains used</b>                                   |                               |         |
|-------------------------------------------------------------------------------------|-------------------------------|---------|
| Wild type                                                                           | CGC                           | N2      |
| <i>zcls4 [hsp-4::GFP] V</i>                                                         | CGC                           | SJ4005  |
| <i>ire-1(zc14) II; zcls4 [hsp-4::GFP] V</i>                                         | CGC                           | SJ30    |
| <i>zls356 [daf-16p::daf-16a/b::GFP + rol-6(su1006)] IV</i>                          | CGC                           | TJ356   |
| <i>rmls132 [unc-54p::Q35::YFP]</i>                                                  | CGC                           | AM140   |
| <i>dvlN70 [hsp-16-2p::GFP; rol-6]</i>                                               | CGC                           | CL2070  |
| <i>daf-11(m47) V</i>                                                                | CGC                           | DR47    |
| <i>daf-1 (m40) IV</i>                                                               | CGC                           | DR40    |
| <i>daf-7 (e1372) III</i>                                                            | CGC                           | CB1372  |
| <i>rmls110 [F25B3.3p::Q40::YFP]</i>                                                 | Imanikia <i>et al.</i> , 2019 | AGD1397 |
| <i>uthls393 [vha-6p::Q40::YFP+rol-6(su1006)]</i>                                    | Imanikia <i>et al.</i> , 2019 | AGD1395 |
| <i>rmsls9 [daf-7p::xbp-1s::unc-54 3'UTR, myo-3p::mKate]; zcls4 [hsp-4p::GFP] V</i>  | Özbey <i>et al.</i> , 2020    | RCT206  |
| <i>rmsls8 [xbp-1p::xbp-1::GFP]</i>                                                  | Özbey <i>et al.</i> , 2020    | RCT21   |
| <i>rmsls7 [tdc-1p::mKate2::let-858 3'UTR, cc::GFP]; rmsls8 [xbp-1p::xbp-1::GFP]</i> | Özbey <i>et al.</i> , 2020    | RCT192  |
| <i>xbp-1 (zc12) III</i>                                                             | Taylor & Dillin, 2013         | AGD1049 |
| <i>xbp-1 (zc12) III; zcls4 [hsp-4::GFP] V</i>                                       | Taylor & Dillin, 2013         | AGD972  |
| <i>unc-13 (e450) I; zcls4 [hsp-4::GFP] V</i>                                        | Taylor & Dillin, 2013         | AGD1137 |

|                                                                                                         |                        |        |
|---------------------------------------------------------------------------------------------------------|------------------------|--------|
| drcSI7 [ <i>daf-7p::Venus</i> ]                                                                         | Tullet Lab, U. of Kent | JMT50  |
| <i>daf-1 (m40) IV; zcls4 [hsp-4::GFP] V; ftEx205[tdc-1p::daf-1:gfp + odr-1:dsRED]</i>                   | This study             | RCT378 |
| <i>pmk-1 (k25) IV; zcls4 [hsp-4::GFP] V</i>                                                             | This study             | RCT379 |
| <i>kgb-1 (um3) IV; zcls4 [hsp-4::GFP] V</i>                                                             | This study             | RCT380 |
| <i>lim-4 (ky403); zcls4 [hsp-4::GFP] V</i>                                                              | This study             | RCT381 |
| <i>oyls84 [gpa-4p::TU#813 + gcy-27p::TU#814 + gcy-27p::GFP + unc-122p::DsRed]; zcls4 [hsp-4::GFP] V</i> | This study             | RCT237 |
| <i>daf-7 (e1372) III; rmls132 [unc-54p::Q35::YFP]</i>                                                   | This study             | RCT382 |
| <i>zip-2 (ok3730) III; zcls4 [hsp-4::GFP] V</i>                                                         | This study             | RCT369 |
| <i>unc-31 (e928) IV; zcls4 [hsp-4::GFP] V</i>                                                           | This study             | RCT370 |
| <i>tdc-1 (n3419) II; zcls4 [hsp-4::GFP] V</i>                                                           | This study             | RCT66  |
| <i>tph-1 (mg280) II; zcls4 [hsp-4::GFP] V</i>                                                           | This study             | RCT371 |
| <i>cat-2 (e1112) II; zcls4 [hsp-4::GFP] V</i>                                                           | This study             | RCT372 |
| <i>unc-25 (e156) III; zcls4 [hsp-4::GFP] V</i>                                                          | This study             | RCT373 |
| <i>eat-4 (ky5) III; zcls4 [hsp-4::GFP] V</i>                                                            | This study             | RCT374 |
| <i>nsls180 [hlh-17p::recCaspase-3, unc-122p::GFP]; zcls4 [hsp-4::GFP] V</i>                             | This study             | RCT375 |
| <i>cho-1 (tm373) IV; zcls4 [hsp-4::GFP] V</i>                                                           | This study             | RCT189 |
| <i>alh-11 (lj118) III; zcls4 [hsp-4::GFP] V</i>                                                         | This study             | RCT376 |
| <i>daf-1 (m40) IV; zcls4 [hsp-4::GFP] V</i>                                                             | This study             | RCT67  |
| <i>daf-7 (e1372) III; zcls4 [hsp-4::GFP] V</i>                                                          | This study             | RCT68  |
| <i>odr-3 (rms31) V; zcls4 [hsp-4::GFP] V</i>                                                            | This study             | RCT377 |

**Supplementary Table 3. List of qPCR primers used in this work.**

|                        | SOURCE | IDENTIFIER         |
|------------------------|--------|--------------------|
| <b>qPCR Primers</b>    |        |                    |
| GTTCCCGTGTTTCATCACTCAT | Sigma  | <i>pmp-3</i> F     |
| ACACCGTCGAGAAGCTGTAGA  | Sigma  | <i>pmp-3</i> R     |
| CTGCTGGACAGGAAGATTACG  | Sigma  | <i>cdc-42</i> F    |
| CTCGGACATTCTCGAATGAAG  | Sigma  | <i>cdc-42</i> R    |
| GTCGCTTCAAATCAGTTCAGC  | Sigma  | <i>Y45F10D.4</i> F |
| GTTCTTGTCAAGTGATCCGACA | Sigma  | <i>Y45F10D.4</i> R |
| CGTGCCTTTGAATCAGCAGTG  | Sigma  | <i>xbp-1_s</i> F   |
| CGAGGTGTCCATCTTCTTGTT  | Sigma  | <i>xbp-1_s</i> R   |
| CAGATGAAACTCAAATCGCC   | Sigma  | <i>hsp-4</i> F     |
| GGTTGCTTCCGAGCCACTCAA  | Sigma  | <i>hsp-4</i> R     |
| CTTTATTCGCTCCCTAACCGT  | Sigma  | <i>Y41C4A.11</i> F |
| CTGCTCCATTCTCCACTCGTT  | Sigma  | <i>Y41C4A.11</i> R |
| TTCTACACCGCCAAAGATCC   | Sigma  | <i>daf-7</i> F     |
| CTGTGAGTGTGGCCTGAAGA   | Sigma  | <i>daf-7</i> R     |

**Supplementary Table 4. List of CRISPR primers and oligonucleotides used in this work.**

|                                                                                                                                                                                                                           | SOURCE | IDENTIFIER                          |
|---------------------------------------------------------------------------------------------------------------------------------------------------------------------------------------------------------------------------|--------|-------------------------------------|
| <b>CRISPR Oligos</b>                                                                                                                                                                                                      |        |                                     |
| GCTACCATAGGCACCACGAG                                                                                                                                                                                                      | IDT    | <i>dpy-10</i><br>cRNA               |
| AAAATTCGGAAGGTAACGCG; C<br>TGCATTTACCGTTGGAAAA                                                                                                                                                                            | IDT    | <i>odr-3</i><br>cRNAs               |
| CACTTGAACTTCAATACGGCAAGATGAG<br>AATGACTGGAAACCGTACCGCATGCGG<br>TGCCTATGGTAGCGGAGCTTCACATGGC<br>TTCAGACCAACAGCCTAT                                                                                                         | IDT    | <i>dpy-10</i><br>Repair<br>Template |
| caattactcatagatcattgTTTTtagATATGGGCTCA<br>TGCCAGAGCAATGAAAATTCGGAAGGTA<br>ACAAATGGACAAAAGAAGCAGAAAAGG<br>CAATAGTTATGAAAGTACAGGAAAATGGAGAAG<br>AAGGAGAAGCACTGACAGAAGAAGTTTCGAAA<br>GCAATTC AATCGTTATGGGCAGATCCTGGCGTGAAGAA | IDT    | <i>odr-3</i><br>Repair<br>Template  |
